# Supplementary material for: Benefits of Docosahexaenoic Acid, Folic Acid, Vitamin D and Iodine on Foetal and Infant Brain Development and Function Following Maternal Supplementation during Pregnancy and Lactation
Source: MDPI journal article supplement (doi:10.3390/nu4070799), 2012-07-24
Supplement: s1 [file s1]

*Correction*

## **Correction: Benefits of Docosahexaenoic Acid, Folic Acid, Vitamin D and Iodine on Foetal and Infant Brain Development and Function Following Maternal Supplementation during Pregnancy and Lactation**

**Nancy L. Morse**

Efamol Ltd., 14 Mole Business Park, Leatherhead KT22 7BA, UK; E-Mail: nancy.morse@wassen.com; Tel.: +1-902-538-8762; Fax: +1-902-538-1443

*Received: 30 July 2012 / Accepted: 3 August 2012 / Published: 3 August 2012*

---

We have found an error in the paper [1] which has been published in Nutrients, reference 83 should be changed to the following one:

83. Bath, S. Maternal iodine status during pregnancy and the impact on cognitive outcomes in the offspring. *Proc. Nutr. Soc.* **2011**, *70*, doi:10.1017/S002966511100471X.

We would like to apologize for any inconvenience caused to our readers.

### **Reference**

1. Morse, N.L. Benefits of Docosahexaenoic Acid, Folic Acid, Vitamin D and Iodine on Foetal and Infant Brain Development and Function Following Maternal Supplementation during Pregnancy and Lactation. *Nutrients* **2012**, *4*, 799–840.

© 2012 by the authors; licensee MDPI, Basel, Switzerland. This article is an open access article distributed under the terms and conditions of the Creative Commons Attribution license (<http://creativecommons.org/licenses/by/3.0/>).
